# Instructions for Obtaining ANESTHESIOLOGY Continuing Medical Education (CME) Credit

CME Editors: Leslie C. Jameson, M.D., and Dan J. Kopacz, M.D.

ANESTHESIOLOGY's Journal CME is open to all readers. Members of the American Society of Anesthesiologists (ASA) enjoy a preferred rate for their subscription. However, Journal CME is not limited to ASA members or Journal subscribers. To take part in Journal CME, complete the following steps:

1. For the article listed on the right, read the learning objectives and disclosure information.
2. Read the article in the print or online edition.
3. Register at <http://education.asahq.org/2012-journal-cme> and provide payment.
4. Once online, complete the questions and other required information for the CME program, including the evaluation.

The American Society of Anesthesiologists is accredited by the Accreditation Council for Continuing Medical Education to provide continuing medical education for physicians.

The American Society of Anesthesiologists designates this journal-based CME activity for a maximum of 1 *AMA PRA Category 1 Credit(s)*<sup>TM</sup>. Physicians should claim only the credit commensurate with the extent of their participation in the activity.

**Purpose:** The focus of ANESTHESIOLOGY Journal CME is to educate readers on current developments in the science and clinical practice of anesthesiology.

**Target Audience:** ANESTHESIOLOGY Journal CME is designed for physicians involved with anesthesiology education, clinical practice, and research.

## Journal CME Planning Participants Disclosures

**Editor-in-Chief:** James C. Eisenach, M.D., returned a disclosure form indicating that he received consulting fees from Adynxx and NeuroGesX.

**CME Editors:** Leslie C. Jameson, M.D., returned a disclosure form indicating that she received consulting fees and honoraria from Masimo and honoraria from GE Medical. Dan J. Kopacz, M.D., had no relevant financial relationships to disclose.

**ASA Staff:** Employees involved in planning have no relevant financial relationships to disclose.

## Claiming Credit

All tests and requests for credit must be submitted through the ANESTHESIOLOGY CME website at <http://education.asahq.org/2012-journal-cme>. Participants should claim credit

in 15-minute increments, for a maximum of 1 *AMA PRA Category 1 Credit(s)*<sup>TM</sup> per journal article.

Two payment options are available:

|            | ASA Member | Non-member |
|------------|------------|------------|
| Annual Fee | \$60       | \$120      |
| Per Issue  | \$10       | \$20       |

Payment may be made using Visa or MasterCard.

Please direct any questions about Journal CME to:

Joyce Canselor

Education Coordinator, CME

(847) 268-9185

[j.canselor@asahq.org](mailto:j.canselor@asahq.org)

## This Month's ANESTHESIOLOGY Journal CME

Read the article by Ramachandran *et al.* entitled "Predictors and clinical outcomes from failed Laryngeal Mask Airway Unique<sup>TM</sup>: A study of 15,795 patients" on page 1217 and the accompanying editorial by Asai entitled "Complications with supraglottic airways: Something to worry about or much ado about nothing?" on page 1183 of this issue.

## Learning Objectives

After completing this activity, the learner will be able to advise patients about the risk of a supraglottic airway, recognize and reduce activities that are associated with supraglottic airway failure, and identify patients who are at lowest risk for complications when placing a supraglottic airway.

## Authors Disclosures

**Authors:** Satya Krishna Ramachandran, M.B.B.S., F.R.C.A., Michael R. Mathis, M.D., Kevin K. Tremper, M.D., Ph.D., Amy M. Shanks, M.S., and Sachin Kheterpal, M.D., M.B.A., have no financial interest in or affiliation with any commercial supporter or providers of any commercial services discussed in this educational material.

**Author:** Takashi Asai, M.D., Ph.D., received honoraria from Intermed Japan, Inc.

## Expiration

Registration and submission of answers must be completed by June 30, 2015.
